# Supplementary material for: Controlled phase evolution from Cu0.33Co0.67S2 to Cu3Co6S8 hexagonal nanosheets as oxygen evolution reaction catalysts
Source: Royal Society of Chemistry journal article supplement (doi:10.1039/c9ra00640k), 2019-01-01
Supplement: c9ra00640k1.pdf [file c9ra00640k1.pdf]

## Supporting Information

### **Controlled Phase Evolution from $\text{Cu}_{0.33}\text{Co}_{0.67}\text{S}_2$ to $\text{Cu}_3\text{Co}_6\text{S}_8$ Hexagonal Nanosheet as Oxygen Evolution Reaction Catalysts**

Jingjing Feng,<sup>1ab</sup> Yu Meng,<sup>1a</sup> Zixuan Lian,<sup>a</sup> Liang Fang,<sup>b</sup> Ziyao Long,<sup>a</sup> Yongtao Li,<sup>\*b</sup> Yun Song<sup>\*ac</sup>

<sup>a</sup> *Department of Materials Science, Fudan University, Shanghai 200433, China*

<sup>b</sup> *School of Materials Science and Engineering, Anhui University of Technology, Maanshan 243032, China*

<sup>c</sup> *Shanghai Innovation Institute for Materials, Shanghai 200444, P. R. China*

<sup>1</sup> *These two authors have equal contribution to this work*

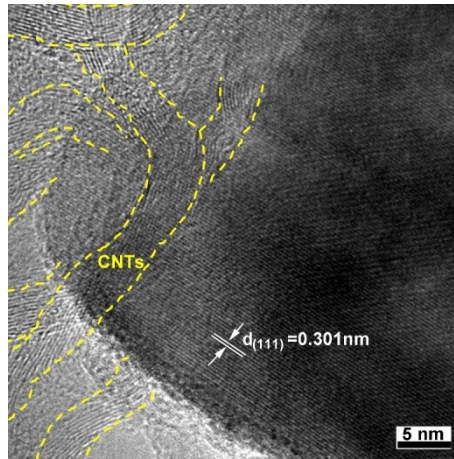

Fig. S1. high-resolution TEM image of  $\text{Cu}_{0.33}\text{Co}_{0.67}\text{S}_2/\text{CNT}$ .

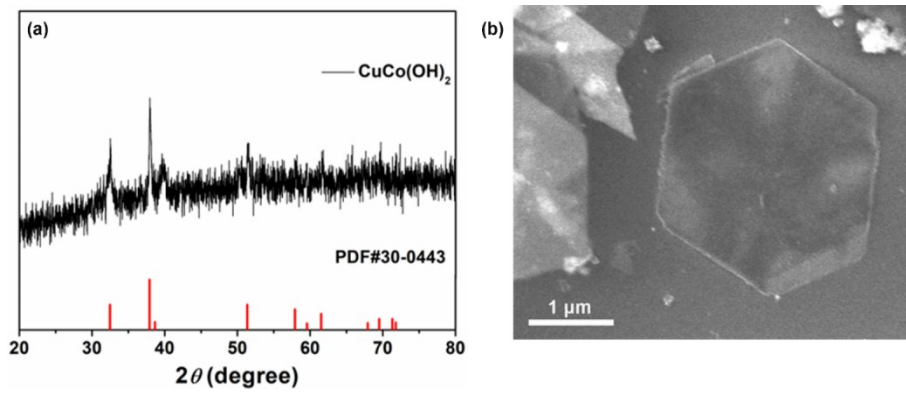

Fig. S2. (a) XRD pattern and SEM image of  $\text{CuCo}(\text{OH})_2$ .

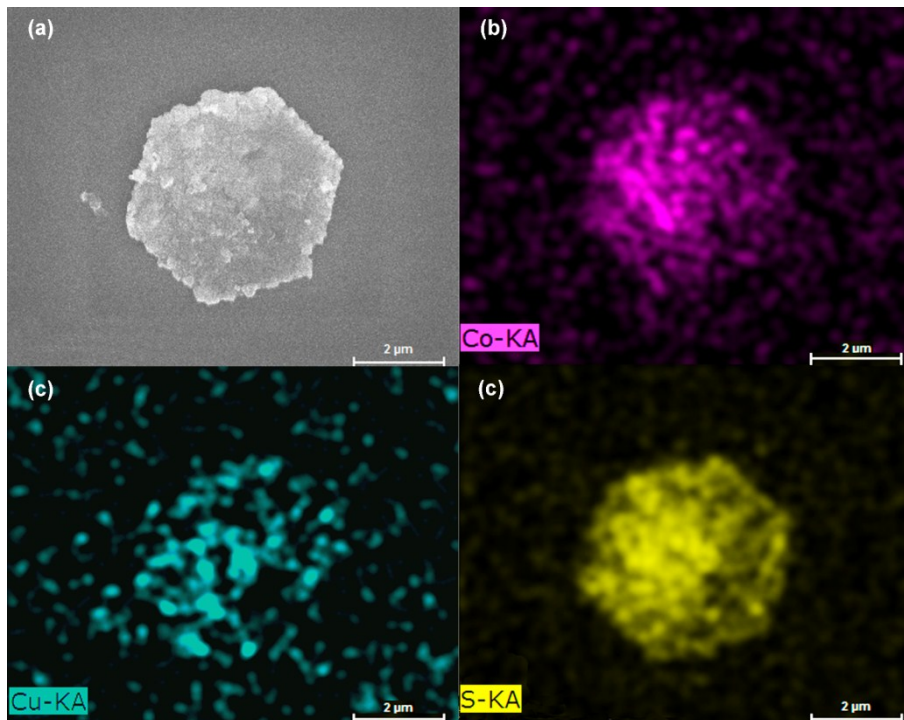

Fig.S3. (a)HAADF-SEM image and (b–d) elemental mapping images of  $\text{Cu}_{0.33}\text{Co}_{0.67}\text{S}_2$ .

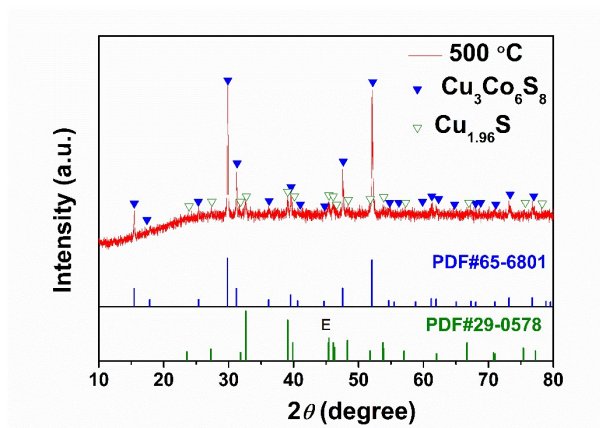

Fig. S4. XRD pattern of the Cu-Co-S product at 500 °C.

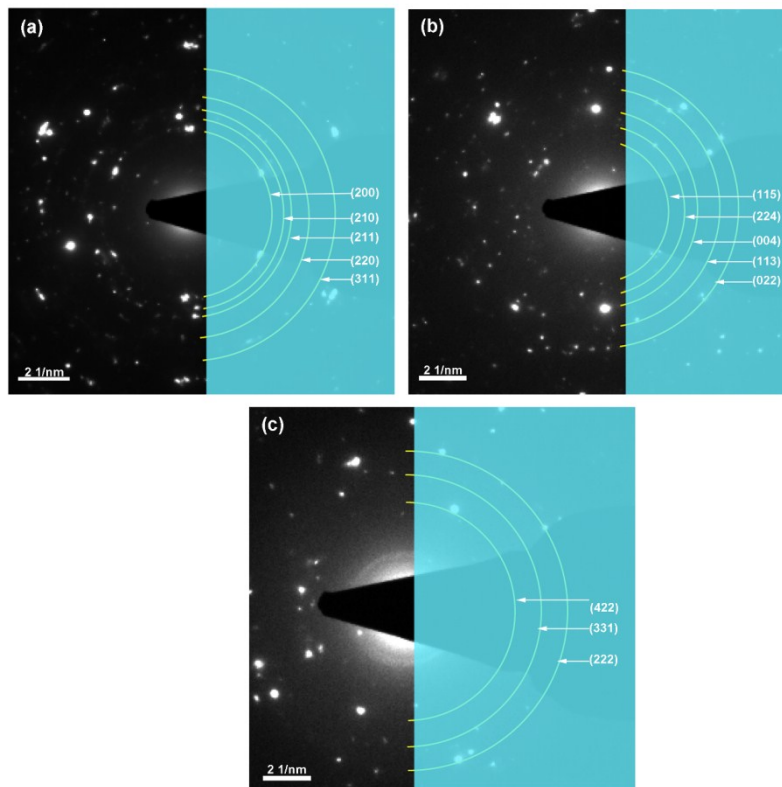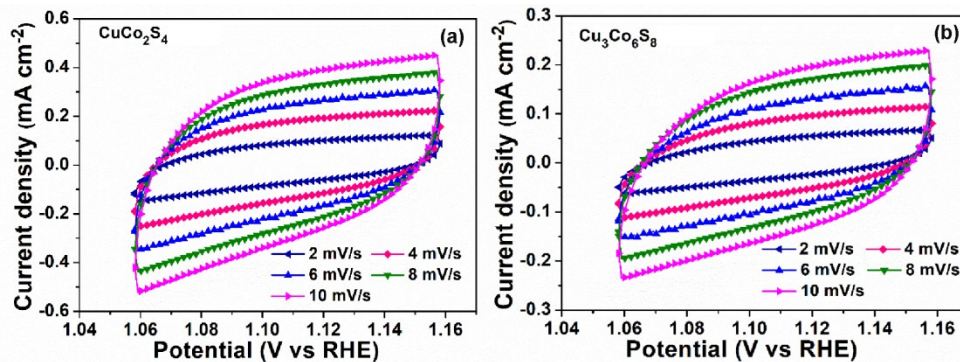

Fig. S5. the corresponding SAED pattern of (a)  $\text{Cu}_{0.33}\text{Co}_{0.67}\text{S}_2$ , (b)  $\text{CuCo}_2\text{S}_4$  and (c)  $\text{Cu}_3\text{Co}_6\text{S}_8$ .

Fig. S6. CVs of (a)  $\text{CuCo}_2\text{S}_4$  and (b)  $\text{Cu}_3\text{Co}_6\text{S}_8$  at various scanning rates.

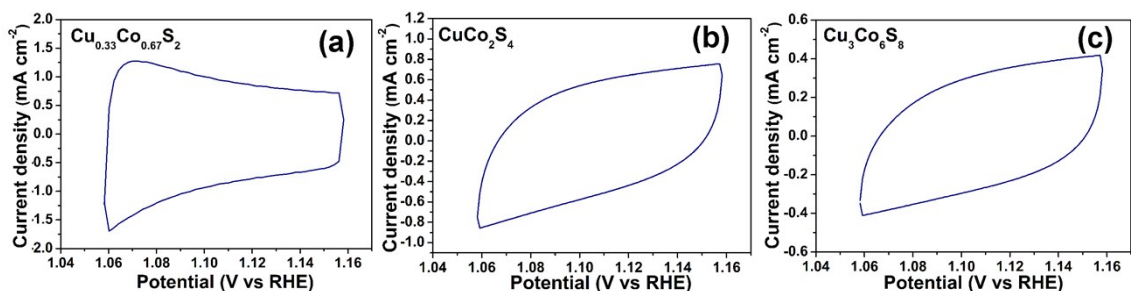

**Fig.S7.** Cyclic voltammograms of (a)  $\text{Cu}_{0.33}\text{Co}_{0.67}\text{S}_2$ , (b)  $\text{CuCo}_2\text{S}_4$  and (c)  $\text{Cu}_3\text{Co}_6\text{S}_8$  at 20 mV/s in 1 M KOH.

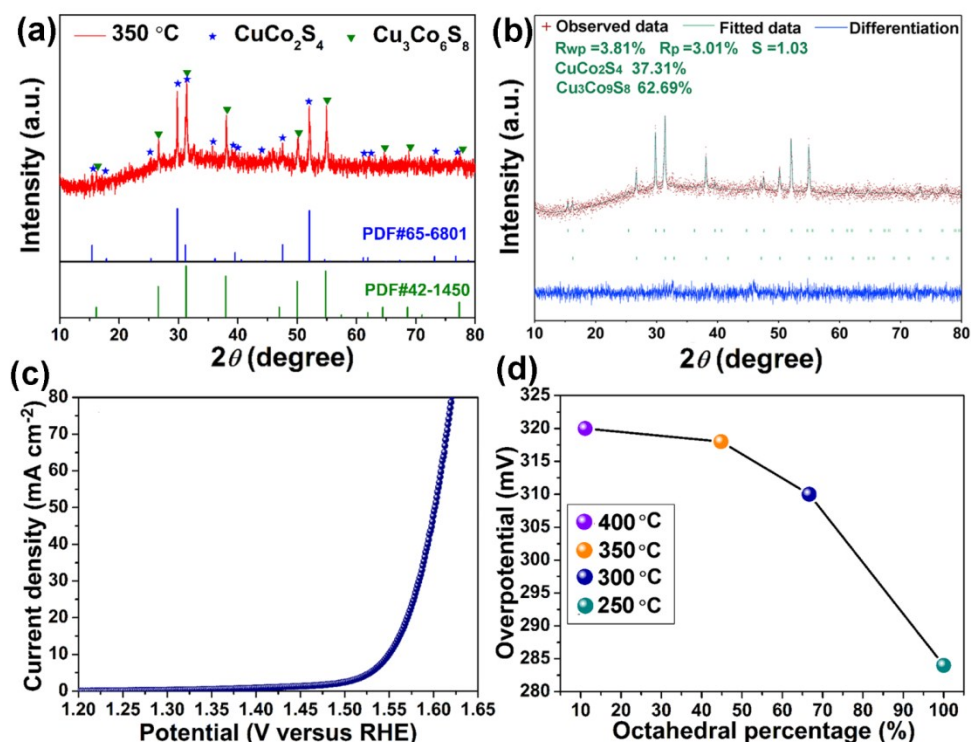

**Fig.S8.** (a) XRD pattern of the Cu-Co-S product at 350 °C. (b) Rietveld refinement of the XRD pattern of the Cu-Co-S product at 350°C. (c) LSV curve of the product at 350 °C. (d) The Relationship of the content of octahedron in products at different temperatures with their overpotential performance.

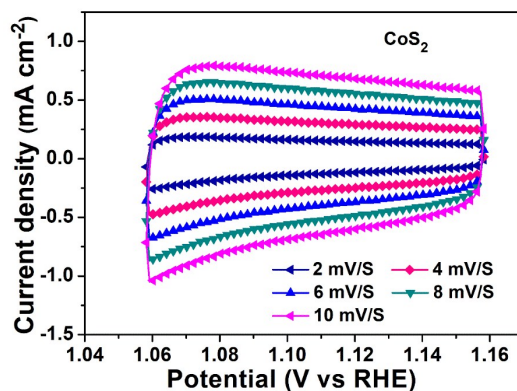

**Fig. S9.** CVs of  $\text{CoS}_2$  at different scan rates.

**Table. S1.** Summary of the electrochemical activities of  $\text{Cu}_{0.33}\text{Co}_{0.67}\text{S}_2$ ,  $\text{CuCo}_2\text{S}_4$ ,  $\text{Cu}_3\text{Co}_6\text{S}_8$  and  $\text{CoS}_2$  for OER.

| Catalyst                                     | Overpotential@1<br>0 mA cm <sup>-2</sup><br>(mV) | Tafel slope<br>(mV dec <sup>-1</sup> ) | C <sub>dl</sub><br>(mF cm <sup>-2</sup> ) | TOF<br>(s <sup>-1</sup> )                                                                                                            | R <sub>ct</sub> |
|----------------------------------------------|--------------------------------------------------|----------------------------------------|-------------------------------------------|--------------------------------------------------------------------------------------------------------------------------------------|-----------------|
| $\text{Cu}_{0.33}\text{Co}_{0.67}\text{S}_2$ | 284                                              | 86                                     | 76.32                                     | 13.512 s <sup>-1</sup> @280 mV<br>19.814 s <sup>-1</sup> @300 mV<br>32.045 s <sup>-1</sup> @320 mV<br>49.940 s <sup>-1</sup> @340 mV | 47              |
| $\text{CuCo}_2\text{S}_4$                    | 310                                              | 90                                     | 31.26                                     | 6.701 s <sup>-1</sup> @280 mV<br>9.799s <sup>-1</sup> @300 mV<br>16.156s <sup>-1</sup> @320 mV<br>27.518 s <sup>-1</sup> @340 mV     | 54              |
| $\text{Cu}_3\text{Co}_6\text{S}_8$           | 320                                              | 91                                     | 15.56                                     | 4.244 s <sup>-1</sup> @280 mV<br>6.548 s <sup>-1</sup> @300 mV<br>11.099 s <sup>-1</sup> @320 mV<br>19.570 s <sup>-1</sup> @340 mV   | 72              |
| $\text{CoS}_2$                               | 343                                              | 98                                     | 67.03                                     | 2.081 s <sup>-1</sup> @280 mV<br>2.8112 s <sup>-1</sup> @300 mV<br>4.905 s <sup>-1</sup> @320 mV<br>9.638 s <sup>-1</sup> @340 mV    | 48              |

**Table. S2.** Rietveld refinement results for the XRD patterns of the  $\text{Cu}_{0.33}\text{Co}_{0.67}\text{S}_2$  and  $\text{CoS}_2$ .

| Sample                                       | Phase          | Space group | Lattice parameters |       |       | Amount (wt%) | S    |
|----------------------------------------------|----------------|-------------|--------------------|-------|-------|--------------|------|
|                                              |                |             | a(Å)               | b(Å)  | c(Å)  |              |      |
| $\text{CoS}_2$                               | $\text{CoS}_2$ | <i>Pa-3</i> | 5.524              | 5.524 | 5.524 | 100          | 1.10 |
| $\text{Cu}_{0.33}\text{Co}_{0.67}\text{S}_2$ | $\text{CoS}_2$ | <i>Pa-3</i> | 5.638              | 5.638 | 5.638 | 100          | 1.05 |

**Table. S3.** Comparison of OER performances of  $\text{Cu}_{0.33}\text{Co}_{0.67}\text{S}_2$  with other reported similar non-noble metal OER electrocatalysts.

| Material                                                         | Electrolyte (KOH) | Scan rate ( $\text{mV s}^{-1}$ ) | $\eta_{10}$ (mv) | Ref.      |
|------------------------------------------------------------------|-------------------|----------------------------------|------------------|-----------|
| $\text{Co}_2\text{P@Co}_3\text{O}_4$                             | 1.0 M             | 5                                | 335              | 1         |
| $\text{Co}_3\text{S}_4\text{@NCNTs}$                             | 0.1 M             | 5                                | 430              | 2         |
| $\text{CoS}_2$ NTA/CC                                            | 1.0 M             | 10                               | 276              | 3         |
| Co-doped Ni–Mn LDH                                               | 1.0M              | 10                               | 310              | 4         |
| $\text{CoS}_2$ HNSs                                              | 1.0 M             | 10                               | 290              | 5         |
| $\text{Co}_9\text{S}_8/\text{Zn}_{0.8}\text{Co}_{0.2}\text{S@C}$ | 0.1 M             | 5                                | 292              | 6         |
| $\text{Co}_9\text{S}_8\text{@NS-3DrGO}$                          | 1.0 M             | 5                                | 317              | 7         |
| oxygenated- $\text{CoS}_2$ – $\text{MoS}_2$                      | 1.0 M             | 2                                | 272              | 8         |
| $\text{Co}_x\text{S}_y\text{@C}$                                 | 0.1 M             | 5                                | 470              | 9         |
| HPMS $\text{Co}_3\text{O}_4/\text{CoS}_2$                        | 1.0 M             | 2                                | 280              | 10        |
| $\text{Zn}_x\text{Co}_{3-x}\text{O}_4$                           | 1.0 M             | 10                               | 435              | 11        |
| $\text{Co}_3\text{O}_4$ Nanoflakes                               | 1.0M              | 5                                | 451              | 12        |
| $\text{CoSe}_2\text{@C}$                                         | 1.0 M             | 10                               | 330              | 13        |
| $\text{CoSe}_2\text{@C-CNT}$                                     | 1.0 M             | 5                                | 306              | 14        |
| Zn-Doped $\text{CoSe}_2$                                         | 1.0 M             | 2                                | 356              | 15        |
| $\text{CoFeP NSs}$                                               | 1.0 M             | 5                                | 305              | 16        |
| octahedral $\text{Co}_3\text{O}_4$ particles                     | 1.0 M             | 2                                | 301              | 17        |
| $\text{Co}_3\text{O}_4\text{@rGO}$                               | 1.0 M             | 2                                | 313              | 18        |
| $\text{CoS}_2\text{@N,S-GO}$                                     | 0.1 M             | 10                               | 390              | 19        |
| $\text{Cu}_{0.33}\text{Co}_{0.67}\text{S}_2$                     | 1 M               | 10                               | 284              | This work |

## Reference

- 1 L. H. Yao, N. Zhang, Y. Wang, Y. M Ni, D. P. Yan and C. W. Hua, *J. Power Sources*, 2018, **374**, 142.
- 2 H. J. Wang, Z. P. Li, G. H. Li, F. Peng and H. Yu, *CATAL TODAY*, 2015, **245**, 74.
- 3 C. Guan, X. M. Liu, A. M. Elshahawy, H. Zhang, H. J. Wu, S. J. Pennycook and J. Wang, *Nanoscale Horiz.*, 2017, **2**, 342.
- 4 Y. Wang, X. H. Liu, N. Zhang, G. Z. Qiu and R. Z. Ma, *APPL CLAY SCI*, 2018, **165**, 277.
- 5 X. Y. Ma, W. Zhang, Y. D. Deng, C. Zhong, W. B. Hu and X. P. Han, *Nanoscale*, 2018, **10**, 4816.
- 6 Z. L. Chen, M. Liu, R. B. Wua, *J. CATAL*, 2018, **361**, 322.
- 7 Y. Li, Y. Z. Zhou, H. J. Wen, J. Yang, C. Maouche, Q. Q. Liu, Y. Y. Wu, C. C. Cheng, J. Zhu and X. N. Cheng, *DALTON T.*, 2018, **47**, 14992.
- 8 J. G. Hou, B. M. Zhang, Z. W. Li, S. Y. Cao, Y. Q. Sun, Y. Z. Wu, Z. M. Gao and L. C. Sun, *ACS CATAL*, 2018, **8**, 4612.
- 9 B. L. Chen, R. Li, G. P. Ma, X. L. Gou, Y. Q. Zhu and Y. D. Xia, *Nanoscale*, 2015, **7**, 20674.
- 10 M. M. Guo, K. Xu, Y. H. Qu, F. Y. Zeng and C. L. Yuan, *ELECTROCHIM ACTA*, 2018, **268**, 10.
- 11 L. Wang, T. J. Meng, C. X. Chen, Y. W. Fan, Q. Q. Zhang, H. Wang and Y. F. Zhang, *J COLLOID INTERF SCI*, 2018, **532**, 650.
- 12 S. Q. Chen, Y. F. Zhao, B. Sun, Z. M. Ao, X. Q. Xie, Y. Y. Wei and G. X. Wang, *ACS APPL MATER INTER*, 2015, **7**, 3306.
- 13 X. B. Liu, Y. C. Liu and L. Z. Fan, *J. Mater. Chem. A.*, 2017, **5**, 15310.
- 14 M. Y. Yuan, M. Wang, P. L. Lu, Y. Sun, S. Dipazir, J. X. Zhang, S.W. Li and G. J. Zhang, *J COLLOID INTERF SCI*, 2019, **533**, 503.
- 15 Q. C. Dong, Q. Wang, Z. Y. Dai, H. J. Qiu and X. C. Dong, *ACS APPL MATER INTER*, 2016, **8**, 26902.
- 16 H. Xua, J. J. Wei, C. F. Liu, Y. P. Zhang, L. Tian, C. q. Wang and Y. k. Du, *ELECTROCHIM ACTA*, 2018, **288**, 82.
- 17 K. Wu, D. Z. Shen, Q. T. Meng and J. H. Wang, *J COLLOID INTERF SCI*, 2018, **530**, 146.
- 18 Y. F. Zhao, S. Q. Chen, B. Sun, D.W. Su, X. D. Huang, H. Liu, Y. M. Yan, K. N. Sun and G. X. Wang, *SCI REP*, 2015, **5**, 7629.
- 19 P. Ganesan, M. Prabu, J. Sanetuntikul and S. Shanmugam, *ACS CATAL*, 2015, **5**, 3625
